# Supplementary material
Source: PubMed Central journal article supplement (PMC6518077)
Supplement: 125_2016_4153_MOESM1_ESM.pdf [file 125_2016_4153_MOESM1_ESM.pdf]

**ESM Table 1: Pooled hazard ratios (95%CI) of type 2 diabetes for dietary net endogenous acid production (NEAP) by strata of BMI, smoking status, hypertension, kidney stones and age.**

|                                     | Quintile 1 | Quintile 2           | Quintile 3                        | Quintile 4                        | Quintile 5                        | P-trend | P-interaction   |
|-------------------------------------|------------|----------------------|-----------------------------------|-----------------------------------|-----------------------------------|---------|-----------------|
| <b>By BMI<sup>b</sup></b>           |            |                      |                                   |                                   |                                   |         | 0.4237          |
| BMI < 25 kg/m                       | 1.00       | 1.05<br>(0.86, 1.29) | 1.09<br>(0.87, 1.37)              | 1.14<br>(1.05, 1.24) <sup>a</sup> | 1.33<br>(1.13, 1.57) <sup>a</sup> | <0.0001 |                 |
| Overweight                          | 1.00       | 0.99<br>(0.84, 1.18) | 1.05<br>(0.91, 1.22)              | 1.06<br>(0.96, 1.18)              | 1.24<br>(1.12, 1.38) <sup>a</sup> | <0.0001 |                 |
| Obesity                             | 1.00       | 0.98<br>(0.88, 1.09) | 1.00<br>(0.85, 1.19)              | 1.06<br>(0.88, 1.27)              | 1.14<br>(0.96, 1.35)              | 0.020   |                 |
| <b>By Smoking<sup>c</sup></b>       |            |                      |                                   |                                   |                                   |         | 0.3272          |
| Never smokers                       | 1.00       | 1.00<br>(0.85, 1.18) | 1.04<br>(0.86, 1.27)              | 1.09<br>(0.92, 1.28)              | 1.23<br>(1.10, 1.39) <sup>a</sup> | <0.0001 |                 |
| Ever smokers                        | 1.00       | 1.05<br>(0.96, 1.16) | 1.09<br>(0.96, 1.24)              | 1.13<br>(1.02, 1.25) <sup>a</sup> | 1.20<br>(1.08, 1.33) <sup>a</sup> | <0.0001 |                 |
| <b>By Hypertension<sup>d</sup></b>  |            |                      |                                   |                                   |                                   |         | 0.8875          |
| No hypertension                     | 1.00       | 1.03<br>(0.88, 1.20) | 1.17<br>(1.07, 1.27) <sup>a</sup> | 1.13<br>(1.04, 1.23) <sup>a</sup> | 1.25<br>(1.15, 1.36) <sup>a</sup> | <0.0001 |                 |
| Hypertension                        | 1.00       | 1.03<br>(0.92, 1.14) | 1.03<br>(0.81, 1.30)              | 1.12<br>(0.92, 1.35)              | 1.17<br>(0.99, 1.38)              | 0.0356  |                 |
| <b>By Kidney stones<sup>e</sup></b> |            |                      |                                   |                                   |                                   |         | 0.3089          |
| No kidney stones                    | 1.00       | 1.02<br>(0.80, 1.30) | 1.05<br>(0.84, 1.31)              | 1.06<br>(0.78, 1.44)              | 0.99<br>(0.70, 1.25)              | 0.5701  |                 |
| Kidney stones                       | 1.00       | 1.03<br>(0.91, 1.15) | 1.07<br>(0.91, 1.20)              | 1.11<br>(0.99, 1.25)              | 1.11<br>(0.99, 1.29)              | 0.3551  |                 |
| <b>By Age<sup>e</sup></b>           |            |                      |                                   |                                   |                                   |         |                 |
| <60 years                           | 1.00       | 1.01<br>(0.85, 1.19) | 1.07<br>(0.87, 1.31)              | 1.07<br>(0.89, 1.28)              | 1.19<br>(1.02, 1.38)              | <0.0002 |                 |
| ≥ 60 years                          | 1.00       | 0.99<br>(0.84, 1.18) | 1.03<br>(0.87, 1.22)              | 1.09<br>(0.87, 1.37)              | 1.13<br>(0.98, 1.31)              | 0.0070  | NA <sup>f</sup> |

Pooled results from NHS, NHS2 and HPFS using random-effect meta-analysis. <sup>a</sup> $P < 0.05$ ; <sup>b</sup>adjusted for total energy intake (quintiles), family history of diabetes (yes/no), menopausal status (pre or postmenopausal (never, past or current menopausal hormone use), presence of hypertension and hypercholesterolemia (yes/no), smoking status (never smoker, former smoker, current smoker: 1-14, 15-24 or ≥ 25 cigarettes/d), alcohol drinking (g/d: 0, 0.1-4.9, 5.0-14.9, 15.0-19.9, 20.0-29.9, and ≥30), moderate/vigorous intensity activities (hours/week: 0, 0.01-1.0, 1.0-3.5, 3.5-6.0, ≥6), glycemic load (quintiles), AHEI-index (quintiles; including the following components: sugar containing beverages, fruit, vegetables, nuts, red meat, whole grains, EPA, DHA, other PUFAs, transfat, and sodium) and Western diet. <sup>c</sup>adjusted for total energy intake (quintiles), family history of diabetes (yes/no), menopausal status (pre or postmenopausal (never, past or current menopausal hormone use), presence of hypertension and hypercholesterolemia (yes/no), alcohol drinking (g/d: 0,

0.1-4.9, 5.0-14.9, 15.0-19.9, 20.0-29.9, and  $\geq 30$ ), moderate/vigorous intensity activities (hours/week: 0, 0.01-1.0, 1.0-3.5, 3.5-6.0,  $\geq 6$ ), body mass index (continuous), glycemic load (quintiles), AHEI-index (quintiles; including the following components: sugar containing beverages, fruit, vegetables, nuts, red meat, whole grains, EPA, DHA, other PUFAs, transfat, and sodium) and Western diet. <sup>d</sup>adjusted for total energy intake (quintiles), family history of diabetes (yes/no), menopausal status (pre or postmenopausal (never, past or current menopausal hormone use), presence of hypercholesterolemia (yes/no), smoking status (never smoker, former smoker, current smoker: 1-14, 15-24 or  $\geq 25$  cigarettes/d), alcohol drinking (g/d: 0, 0.1-4.9, 5.0-14.9, 15.0-19.9, 20.0-29.9, and  $\geq 30$ ), moderate/vigorous intensity activities (hours/week: 0, 0.01-1.0, 1.0-3.5, 3.5-6.0,  $\geq 6$ ), body mass index (continuous) glycemic load (quintiles), AHEI-index (quintiles; including the following components: sugar containing beverages, fruit, vegetables, nuts, red meat, whole grains, EPA, DHA, other PUFAs, transfat, and sodium) and Western diet. <sup>e</sup>adjusted for total energy intake (quintiles), family history of diabetes (yes/no), menopausal status (pre or postmenopausal (never, past or current menopausal hormone use), presence of hypertension and hypercholesterolemia (yes/no), smoking status (never smoker, former smoker, current smoker: 1-14, 15-24 or  $\geq 25$  cigarettes/d), alcohol drinking (g/d: 0, 0.1-4.9, 5.0-14.9, 15.0-19.9, 20.0-29.9, and  $\geq 30$ ), moderate/vigorous intensity activities (hours/week: 0, 0.01-1.0, 1.0-3.5, 3.5-6.0,  $\geq 6$ ), body mass index (continuous), glycemic load (quintiles), AHEI-index (quintiles; including the following components: sugar containing beverages, fruit, vegetables, nuts, red meat, whole grains, EPA, DHA, other PUFAs, transfat, and sodium) and Western diet. <sup>f</sup> Due to age-stratification in cox proportional hazard model

The results were pooled using random-effect meta-analysis.
